# Supplementary material for: Icariin-loaded sulfonated polyetheretherketone with osteogenesis promotion and osteoclastogenesis inhibition properties via immunomodulation for advanced osseointegration
Source: Royal Society of Chemistry journal article supplement (doi:10.1039/d1tb02802b), 2022-01-01
Supplement: d1tb02802b1.pdf [file d1tb02802b1.pdf]

**Icariin-loaded Sulfonated Polyetheretherketone with Osteogenesis  
Promotion and Osteoclastogenesis Inhibition Properties via  
Immunomodulation for Advanced Osseointegration**

Haobu Chai, Shang Sang, Yao Luo, Renke He, Xiangwei Yuan\*, Xianlong Zhang\*

Department of Orthopaedics, Shanghai Jiao Tong University Affiliated Sixth People's  
Hospital, Shanghai Jiao Tong University, Shanghai 200233, China

\* Corresponding Authors:

Xianlong Zhang. E-mail: dr\_zhangxianlong@sjtu.edu.cn

Xiangwei Yuan. E-mail: jackshine@126.com

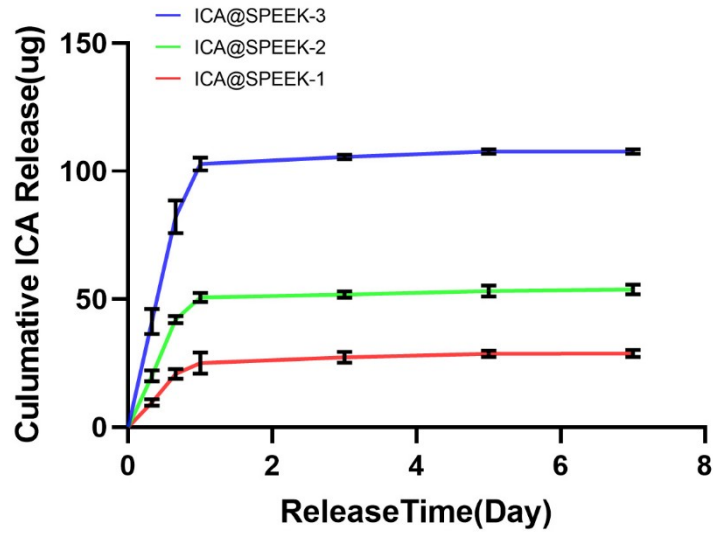

**Figure S1** ICA release curves of three kinds of ICA@SPEEK.

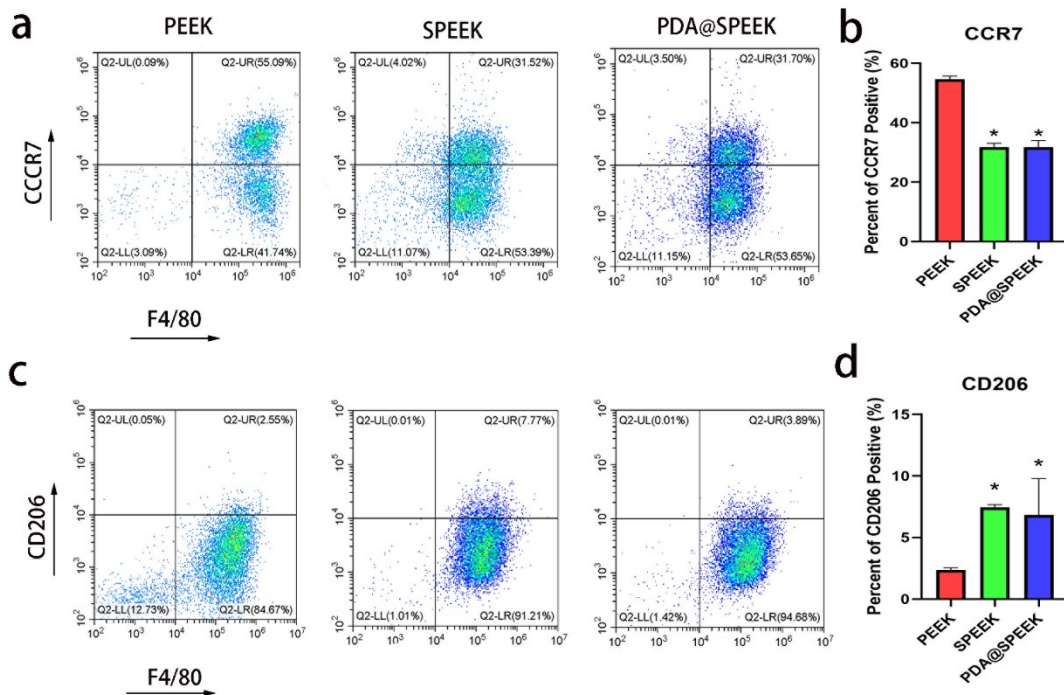

**Figure S2** *In vitro* macrophage polarization. (a, c) Representative dot images of surface marker CCR7 (M1 macrophages) and CD206 (M2 macrophages) of BMDMs analyzed by flow cytometry, respectively. (b, d) Percentage of CCR7 and CD206 positive cells respectively. (\*represent  $P < 0.05$  when compared with PEEK)
